# Supplementary material
Source: PubMed Central journal article supplement (PMC6755804)
Supplement: supp_RA118.007265_142738_2_supp_347701_pt376z.pdf [file supp_RA118.007265_142738_2_supp_347701_pt376z.pdf]

## SUPPLEMENTARY TABLES

**Supplementary Table S1: Forward and Reverse primer sequences used in Sanger sequencing for mutation identification in p53 gene (from exon 4 to exon 9)**

| Exon | Forward (5' to 3')    | Reverse (5' to 3')     |
|------|-----------------------|------------------------|
| 4    | CGTCTTCCAGTTGCTTTATC  | AAGAAGAAAACGGCATTTTG   |
| 5    | TTTCAACTCTGTCTCCTTCC  | AACCAGCCCCTGTCGTCTCTC  |
| 6    | TGGTTGCCCAGGGTCCCCAG  | GGAGGGCCACTGACAACCA    |
| 7    | CTTGCCACAGGTCTCCCCAA  | AGGGGTCAGAGGCAAGCAGA   |
| 8    | AAAGGACAAG GGTGGTTGGG | CTGCACCCTTGGTCTCCTCC   |
| 9    | CGGTGGAGGAGACCAAGGGT  | AAGAAGAAAAAACGGCATTTTG |

**Supplementary Table S2: Phred Quality check of the sequencing data**

| Sample | Read Length | Total reads | Sequence with poor quality (Phred cut off 30) |
|--------|-------------|-------------|-----------------------------------------------|
| TCT1   | 101         | 40085392    | 0                                             |
| TCT2   | 101         | 38477800    | 0                                             |
| TMU1   | 101         | 41984560    | 0                                             |
| TMU2   | 101         | 40625508    | 0                                             |

TCT - Tumor Control (RNA isolated from tumor formed from pCMV10 Ctrl cells)

TMU - Tumor Mutant (RNA isolated from tumor formed from P152Lp53 expressing cells)

**Supplementary Table S3: Alignment statistics of the sequencing data**

| <b>Read statistics</b>                   | <b>TCT1 for each pair 1 and pair 2 Alignment</b> | <b>TCT2 for each pair 1 and pair 2 Alignment</b> | <b>TMU1 for each pair 1 and pair 2 Alignment</b> | <b>TMU2 for each pair 1 and pair 2 Alignment</b> |
|------------------------------------------|--------------------------------------------------|--------------------------------------------------|--------------------------------------------------|--------------------------------------------------|
| Number of input reads( pair 1+pair 2)    | 20042686*2                                       | 19288900*2                                       | 20992485*2                                       | 20312754*2                                       |
| Average input read length                | 202                                              | 202                                              | 202                                              | 202                                              |
| <b>UNIQUE READS:</b>                     |                                                  |                                                  |                                                  |                                                  |
| Uniquely mapped reads number             | 17204309*2                                       | 16169836*2                                       | 18084230*2                                       | 17226684*2                                       |
| Uniquely mapped reads %                  | 85.84%                                           | 83.83%                                           | 86.15%                                           | 84.81%                                           |
| <b>MULTI-MAPPING READS:</b>              |                                                  |                                                  |                                                  |                                                  |
| Number of reads mapped to multiple loci  | 1497489*2                                        | 1400296*2                                        | 1530895*2                                        | 1450244*2                                        |
| % of reads mapped to multiple loci       | 7.47%                                            | 7.26%                                            | 7.29%                                            | 7.14%                                            |
| Number of reads mapped to too many loci  | 14148*2                                          | 11117*2                                          | 12565*2                                          | 14138*2                                          |
| % of reads mapped to too many loci       | 0.07%                                            | 0.06%                                            | 0.06%                                            | 0.07%                                            |
| <b>UNMAPPED READS:</b>                   |                                                  |                                                  |                                                  |                                                  |
| % of reads unmapped: too many mismatches | 0.00%                                            | 0.00%                                            | 0.00%                                            | 0.00%                                            |
| % of reads unmapped: too short           | 6.51%                                            | 8.74%                                            | 6.40%                                            | 7.88%                                            |
| % of reads unmapped: other               | 0.11%                                            | 0.11%                                            | 0.11%                                            | 0.10%                                            |

**Supplementary Table S4: Forward and Reverse primer sequences for qPCR**

| <b>Gene</b> | <b>Forward (5' to 3')</b> | <b>Reverse (5' to 3')</b> |
|-------------|---------------------------|---------------------------|
| ITPR3       | CCGCGTGAAGAACAAGACCG      | CGCCCTCATTGCTGACAAGG      |
| FOSB        | CCTAGGAGACCCCGAGAGGA      | GATCTTGCAGCCCGGTTTGT      |
| TIAM1       | TTGTGTGCACTGAAGGGGGC      | CTTGCGGAGACGGCATCAGA      |
| ARHGEF4     | CGAGCGGAAGCGGAGACTT       | CTGCTGGCTTTTGGCTTGAGG     |
| PSAP        | TCCTGGTGGAGGTGATGGAT      | ATGGCGTTTGC AATGCTCGAC    |
| CBLB        | TCTTCTTCCTTCAGATCCCTTTGT  | GTGGTTTAGGGGGTCTGGCT      |
| BCL2        | CAGTGCAATGGCTTCCATGAG     | ATTCGTGGGTGGTCTTCGGC      |
| PTCH1       | TGATGCTGGCGGGATCTGAG      | GCTGGAGACACCTCAGGATATGG   |
| P4HA1       | ATTTTGACTTTGCACGGAAAGATG  | GGCTCCTCCTGCAGACACAT      |
| COL4A5      | GACCTCAAGGCTTACCAGGTCCA   | GGACCATCCAAACCACGGGTA     |
| IGF1R       | CTCGGACGTCTGGTCCTTC       | GCACATGCGCATCAGTTCAA      |
| DUSP1       | AGGCCATTGACTTCATAGACTCC   | TGCTTCGCCTCTGCTTCACA      |
| COL9A3      | ACCAGGGTATTGCAGGTTCCG     | CTCGACTGCCAGACTCTCCTTT    |
| NPY1R       | ACCACTCTCCTCTTGGTGCTG     | TGGTTTCACTGGACCTGTACTT    |
| FOXO4       | ACTTTGAGCCAGATCCCTGAGT    | TGTGTGTGACCAGACCCAC       |
| NR4A1       | CTTGTCTCATCACCGACCG       | TGCCCAACAGACGTGACAGG      |
| SPOCK3      | CAGAGACAGCAAGACCCACCT     | CACACCAGCACTGTCCAACAC     |
| MMP1        | AAGACAGATTCTACATGCGCACAA  | CTGTCCCTGAACAGCCCAGT      |
| COL11A1     | CCCAGGGTCTGTTGGTTCAGT     | CTTTCTCCTTTGGGACCGCCT     |

**Supplementary Table S5: Representative data for the Allelic Discrimination assay to determine the zygosity of P152Lp53 (ID rs587782705 custom designed by Applied Biosystems).** Table shows manual calls of SNP assays of patient tumor (66951) and control tumor (247221, 262411, 62265) samples where the alleles were called based upon their  $\Delta Rn$  and  $\Delta Ct$  values

| <b>SNP Assay Name<br/>(Lot No.)</b> | <b>Sample</b> | <b>Allele1<br/><math>\Delta Rn</math></b> | <b>Allele2<br/><math>\Delta Rn</math></b> | <b>Allele 1<br/><math>\Delta Ct</math></b> | <b>Allele2<br/><math>\Delta Ct</math></b> | <b>Call</b>           |
|-------------------------------------|---------------|-------------------------------------------|-------------------------------------------|--------------------------------------------|-------------------------------------------|-----------------------|
| 1642570                             | 247221-T      | 1.784                                     | 0.166                                     | 23.194                                     | 26.547                                    | Homozygous 1/1        |
| 1642570                             | 262411-T      | 1.707                                     | 0.216                                     | 23.42                                      | 25.294                                    | Homozygous 1/1        |
| 1642570                             | 62265-T       | 1.923                                     | 0.270                                     | 21.216                                     | 23.923                                    | Homozygous 1/1        |
| 1642570                             | 66951-T       | 1.790                                     | 1.216                                     | 21.81                                      | 20.88                                     | Heterozygous 1/2      |
| 1642570                             | 66951-T       | 1.546                                     | 1.068                                     | 21.97                                      | 21.12                                     | Heterozygous 1/2      |
|                                     | NTC           | 0.10397<br>23                             | 0.0217072                                 | UD                                         | UD                                        | Negative Control (NC) |
|                                     | NTC           | 0.15458<br>28                             | 0.0707385                                 | UD                                         | UD                                        | Negative Control (NC) |

**Supplementary Table S6: p53 Responsive-element consensus sequence -**

| <b>Gene</b> | <b>p53 promoter consensus sequence</b>                                                  |
|-------------|-----------------------------------------------------------------------------------------|
| GADD45A     | 5'- TACAGAACATGTCTAAGCATGCTGGGGACT -3' and<br>5'- AGTCCCCAGCATGCTTAGACATGTTCTGTA -3'    |
| CDKN1A      | 5'- ATGAGGAACATGTCCCAACATGTTGAGCTC - 3' and<br>5' - GAGCTCAACATGTTGGGACATGTTCCCTCAT- 3' |
| BAX         | 5'- TGGGCTCACAAGTTAGAGACAAGCCTGGGCG - 3' and<br>5'- CGCCCAGGCTTGTCTCTAACTTGTGAGCCCA -3' |
| MDM2        | 5'- GGGCTGGTCAAGTTCAGACACGTCCGGCGT - 3' and<br>5'- ACGCCGGACGTGTCTGAACTTGACCAGCCC - 3'  |
